# Supplementary material for: A Phylogeographical Analysis of the Beetle Pest Species Callosobruchus chinensis (Linnaeus, 1758) in China
Source: MDPI journal article supplement (doi:10.3390/insects13020145), 2022-01-29

# *Insects*

## SUPPORTING INFORMATION

### **A Phylogeographical Analysis of the beetle pest species**

### ***Callosobruchus chinensis* (Linnaeus, 1758) in China**

Fang Wang <sup>1,†</sup>, Min Li<sup>2,†</sup>, Haixia Zheng<sup>1</sup>, Tian Dong<sup>1</sup> and Xianhong Zhang<sup>1,\*</sup>

<sup>1</sup> College of Plant Protection, Shanxi Agricultural University, Jinzhong 030801, China 1;  
wangruifang24@163.com (F.W.); zhenghaixia722@163.com (H-X.Z.);  
18234475698@163.com (T.D.)

<sup>2</sup> Department of Biology, Taiyuan Normal University, Jinzhong 030619, China 2;  
limin12nk@163.com (M.L.)

\* Correspondence: Xianhong Zhang, College of Plant Protection, Shanxi Agricultural University, Jinzhong 030801, China. Email: zxh6288@126.com. Tel.: +86-1383-483-7840

† These authors contributed equally to this work.

**Table S1.** Information on the 22 sites from which *Callosobruchus chinensis* were collected.

| Population Code | Sampling location          | Longitude | Latitude |
|-----------------|----------------------------|-----------|----------|
| SJT             | Taigu, Jinzhong, Shanxi    | 112.55°E  | 37.42°N  |
| SCQ             | Qin, Changzhi, Shanxi      | 112.7°E   | 36.75°N  |
| SCW             | Wuxiang, Changzhi, Shanxi  | 112.85°E  | 36.83°N  |
| SLZ             | Zhongyang, Lvliang, Shanxi | 111.18°E  | 37.33°N  |
| SXX             | Xinfu, Xinzhou, Shanxi     | 112.73°E  | 38.42°N  |
| SXH             | Hequ, Xinzhou, Shanxi      | 111.13°E  | 39.38°N  |
| SYQ             | Yuanqu, Yuncheng, Shanxi   | 111.67°E  | 35.3°N   |
| SSY             | Youyu, Shuozhou, Shanxi    | 112.47°E  | 39.98°N  |
| SD1             | Hedong, Linyi, Shandong    | 118.4°E   | 35.08°N  |
| SD2             | Jinan, Shandong            | 116.98°E  | 36.67°N  |
| HL              | Luohe, Henan               | 114.02°E  | 33.58°N  |
| HB1             | Quzhou, Handan, Hebei      | 114.95°E  | 36.78°N  |
| HB2             | Neiqiu, Xingtai, Hebei     | 114.52°E  | 37.3°N   |
| SW              | Heyang, Weinan, Shaanxi    | 110.15°E  | 35.23°N  |
| JX              | Nanchang, Jiangxi          | 115.85°E  | 28.68°N  |
| AH              | Huaibei, Anhui             | 116.8°E   | 33.95°N  |
| TJ              | Tianjing                   | 117.2°E   | 39.12°N  |
| NM              | Hohhot, Inner Mongolia     | 111.73°E  | 40.83°N  |
| SC              | Nanchong, Sichuan          | 106.08°E  | 30.78°N  |
| HJ              | Duodao, Jingmen, Hubei     | 112.2°E   | 30.98°N  |
| JS              | Xuanwu, Nanjing, Jiangsu   | 118.8°E   | 32.05°N  |
| GZ              | Fenggang, Zunyi, Guizhou   | 107.72°E  | 27.97°N  |

**Figure S1.** Occurrence Data from field collection

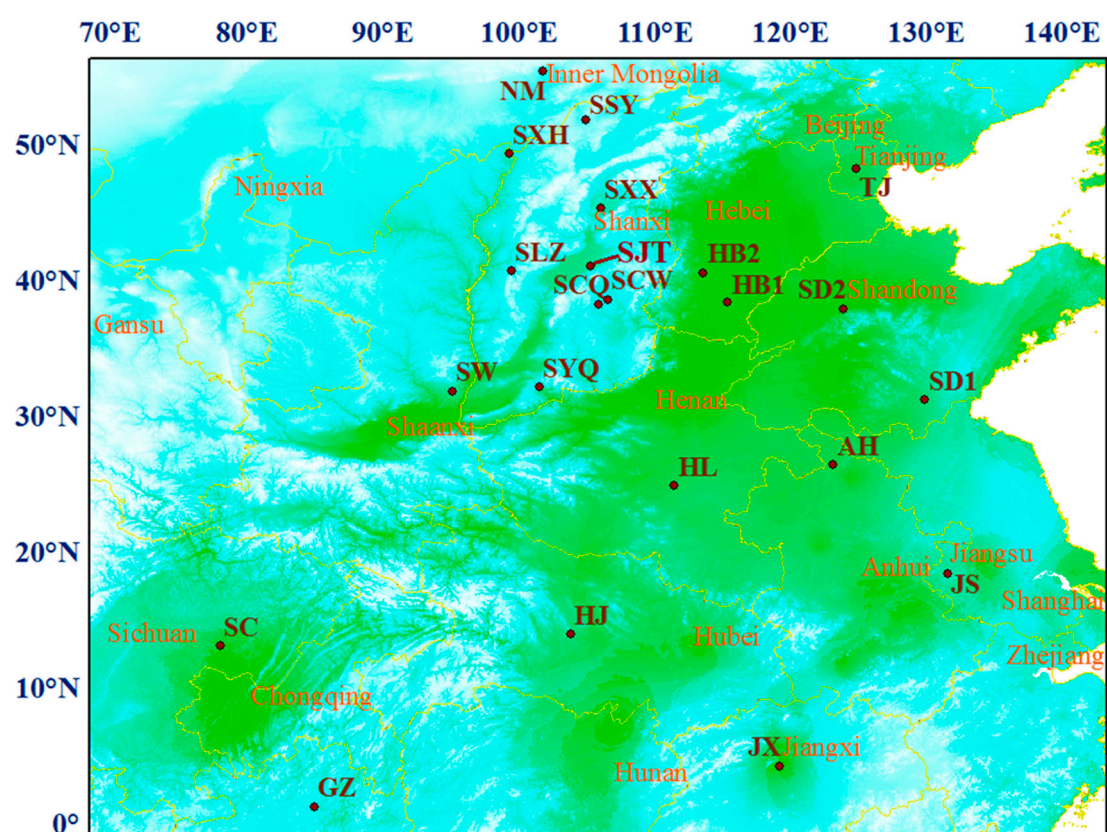

Table S2. Data on 80 occurrence points of *Callosobruchus chinensis* used in this study in China

| Location                  | Longitude | Latitude | Source     |
|---------------------------|-----------|----------|------------|
| Mentougou, Beijing        | 116.1°E   | 39.93°N  | [44]       |
| Qingfeng, Henan           | 113.65°E  | 34.73°N  | [102]      |
| Jingning, Zhejiang        | 119.63°E  | 27.98°N  | [103]      |
| Ili, Xinjiang             | 81.32°E   | 43.92°N  | [104]      |
| Urumqi, Xinjiang          | 87.62°E   | 43.82°N  | [44]       |
| Luliang, Yunnan           | 103.67°E  | 25.03°N  | [44]       |
| Dali, Yunnan              | 100.23°E  | 25.6°N   | [105]      |
| Qujing, Yunnan            | 103.8°E   | 25.5°N   | [105]      |
| Kaiyuan, Yunnan           | 103.27°E  | 23.72°N  | [105]      |
| Kunming, Yunnan           | 102.72°E  | 25.05°N  | [105]      |
| Huangnihe, Fuyuan, Yunnan | 104.25°E  | 25.67°N  | [106]      |
| Jiangchuan,, Yunnan       | 102.75°E  | 24.28°N  | [44]       |
| Bobai, Guangxi            | 109.97°E  | 22.28°N  | [44]       |
| Fuchuan, Guangxi          | 111.27°E  | 24.83°N  | [44]       |
| Daxin, Guangxi            | 107.2°E   | 22.83°N  | [44]       |
| Lingchuan, Shanxi         | 113.27°E  | 35.78°N  | [44]       |
| Hefei, Anhui              | 117.25°E  | 31.83°N  | [44]       |
| Mengcheng, Anhui          | 116.57°E  | 33.27°N  | [44]       |
| Rudong, Jiangsu           | 121.18°E  | 32.32°N  | [44]       |
| Lishui, Jiangsu           | 119.02°E  | 31.65°N  | [44]       |
| Dengzhou, Henan           | 112.08°E  | 32.68°N  | [44]       |
| Xinye, Henan              | 112.35°E  | 32.52°N  | [44]       |
| Yangyuan, Hebei           | 114.17°E  | 40.12    | [44]       |
| Tangshan, Hebei           | 118.2°E   | 39.63°N  | [44]       |
| Baoding, Hebei            | 115.47°E  | 38.87°N  | [44]       |
| Qingdao, Shandong         | 120.38°E  | 36.07°N  | [44]       |
| Shenyang, Liaoning        | 123.43°E  | 41.8°N   | [107]      |
| Qingzhou, Shandong        | 118.47°E  | 36.68°N  | [108]      |
| Xichang, Sichuan          | 102.27°E  | 27.9°N   | [107]      |
| Ningnan, Sichuan          | 102.77°E  | 27.07°N  | [109]      |
| Ebian, Sichuan            | 103.27°E  | 29.23°N  | [109]      |
| Dazu County, Chongqing    | 105.72°E  | 29.7°N   | [107]      |
| Chongqing                 | 106.55°E  | 29.57°N  | [110]      |
| Wulong, Chongqing         | 107.75°E  | 29.33°N  | [44]       |
| Qianjiang, Chongqing      | 108.77°E  | 29.53°N  | [44]       |
| Hechuan, Chongqing        | 106.28°E  | 29.97°N  | [109]      |
| Beibei, Chongqing         | 106.4°E   | 29.8°N   | [111]      |
| Baicheng City, Jilin      | 122.85°E  | 45.62°N  | [112]      |
| Wuhan City, Hubei         | 114.33°E  | 30.5°N   | [108]      |
| Nanyang, Henan            | 112.52°E  | 33°N     | collection |
| Taigu, Shanxi             | 112.55°E  | 37.42°N  | collection |

|                          |          |         |            |
|--------------------------|----------|---------|------------|
| Qin, Shanxi              | 112.7°E  | 36.75°N | collection |
| Wuxiang, Shanxi          | 112.85°E | 36.83°N | collection |
| Zhongyang, Shanxi        | 111.18°E | 37.33°N | collection |
| Xinfu, Shanxi            | 112.73°E | 38.42°N | collection |
| Hequ, Shanxi             | 111.13°E | 39.38°N | collection |
| Yuanqu, Shanxi           | 111.67°E | 35.3°N  | collection |
| Youyu, Shanxi            | 112.47°E | 39.98°N | collection |
| Zhengwang, Shandong      | 118.4°E  | 35.08°N | collection |
| Jinan, Shandong          | 116.98°E | 36.67°N | collection |
| Luohe City, Henan        | 114.02°E | 33.58°N | collection |
| Quzhou, Hebei            | 114.95°E | 36.78°N | collection |
| Neiqiu, Hebei            | 114.52°E | 37.3°N  | collection |
| Heyang, Shaanxi          | 110.15°E | 35.23°N | collection |
| Huaibei City, Anhui      | 116.8°E  | 33.95°N | collection |
| Tianjin                  | 117.2°E  | 39.12°N | collection |
| Hohhot in Inner Mongolia | 111.73°E | 40.83°N | collection |
| Nanchong City, Sichuan   | 106.08°E | 30.78°N | collection |
| Macheng, Hubei           | 112.2°E  | 30.98°N | collection |
| Xuanwu, Jiangsu          | 118.8°E  | 32.05°N | collection |
| Fenggang, Guizhou        | 107.72°E | 27.97°N | collection |
| Guangzhou, Guangdong     | 113.27°E | 23.13°N | GBIF       |
| Huiyang, Guangdong       | 114.47°E | 22.8°N  | GBIF       |
| Zhongshan, Guangdong     | 113.38°E | 22.52°N | GBIF       |
| Lianzhou, Guangdong      | 112.38°E | 24.78°N | GBIF       |
| Huangmei, Hubei          | 115.93°E | 30.08°N | GBIF       |
| Haikou, Hainan           | 110.35°E | 20.02°N | GBIF       |
| Tainan, Taiwan           | 120.2°E  | 23°N    | GBIF       |
| Pingtung, Taiwan         | 120.48°E | 22.67°N | [43]       |
| Tainan, Taiwan           | 120.32°E | 23.32°N | [43]       |
| Danyang, Jiangsu         | 119.57°E | 32°N    | [108]      |
| Wujiang, Jiangsu         | 120.63°E | 31.17°N | [108]      |
| Taizhou, Jiangsu         | 119.92°E | 32.45°N | [108]      |
| Xinjian, Jiangxi         | 115.82°E | 28.7°N  | [108]      |
| Tai'an, Shandong         | 117.08°E | 36.2°N  | [108]      |
| Yangling, Shaanxi        | 108.07°E | 34.28°N | [108]      |
| Tarim, Xinjiang          | 81.28°E  | 40.55°N | [108]      |
| Wuhu City, Anhui         | 118.38°E | 31.33°N | [108]      |
| Jingzhou, Hubei          | 112.23°E | 30.33°N | [108]      |
| Minqin, Gansu            | 103.08°E | 38.62°N | [108]      |

---



**Figure S2.** Data on 80 occurrence points of *Callosobruchus chinensis* used in this study in China.

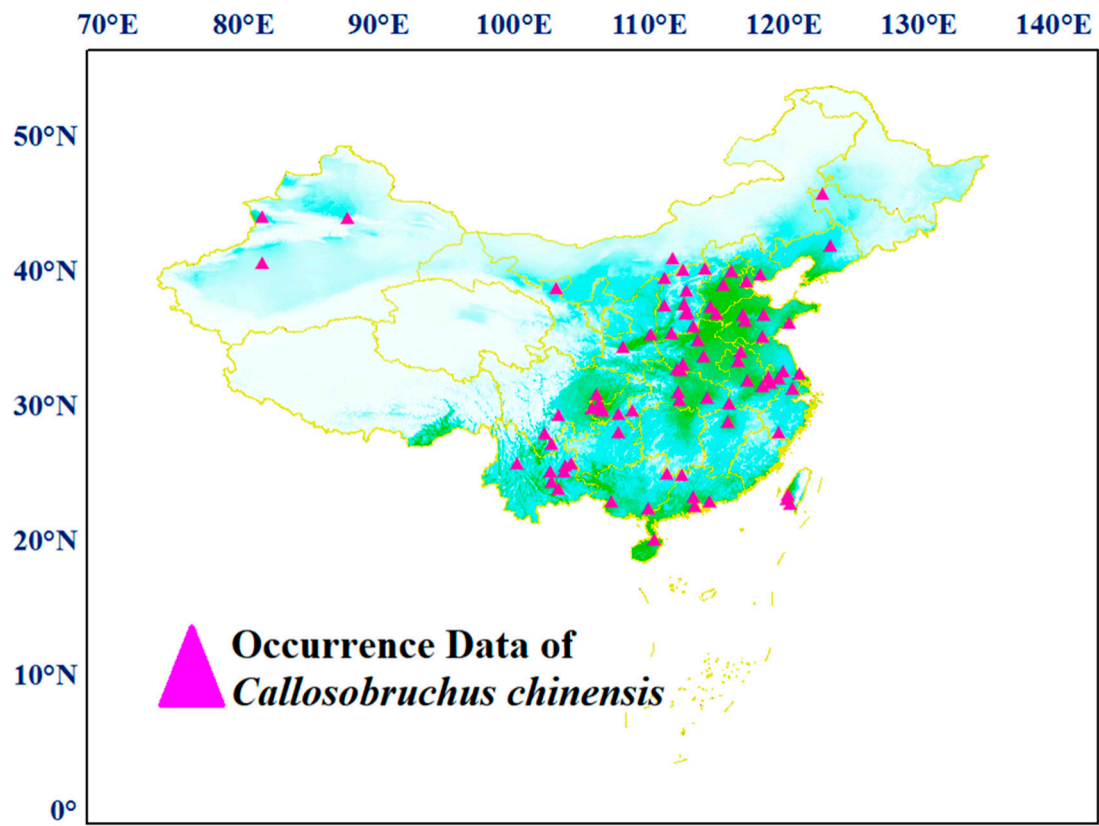

Table S3 Indices of 19 environmental variables in Worldclim.

| Name of data | Description                                                  |
|--------------|--------------------------------------------------------------|
| Bio1         | Annual mean temperature(°C)                                  |
| Bio2         | Mean diurnal range (mean of monthly [max temp-min temp])(°C) |
| Bio3         | Isothermality(bio2/bio7) *100                                |
| Bio4         | Temperature seasonality (standard deviation *100)            |
| Bio5         | Max temperature of warmest month(°C)                         |
| Bio6         | Min temperature of coldest month(°C)                         |
| Bio7         | Temperature annual range(bio5-bio6) (°C)                     |
| Bio8         | Mean temperature of wettest quarter(°C)                      |
| Bio9         | Mean temperature of driest quarter(°C)                       |
| Bio10        | Mean temperature of warmest quarter(°C)                      |
| Bio11        | Mean temperature of coldest quarter(°C)                      |
| Bio12        | Annual precipitation(mm)                                     |
| Bio13        | Precipitation of wettest month(mm)                           |
| Bio14        | Precipitation of driest month(mm)                            |
| Bio15        | Precipitation seasonality (Coefficient of Variation)         |
| Bio16        | Precipitation of wettest quarter(mm)                         |
| Bio17        | Precipitation of driest quarter (mm)                         |
| Bio18        | Precipitation of warmest quarter (mm)                        |
| Bio19        | Precipitation of coldest quarter (mm)                        |



Figure S3. The best AUC value of model prediction with ROC curves under current condition. The area under the curve (AUC) of receiver operating characteristic is to evaluate accuracy of model performance.

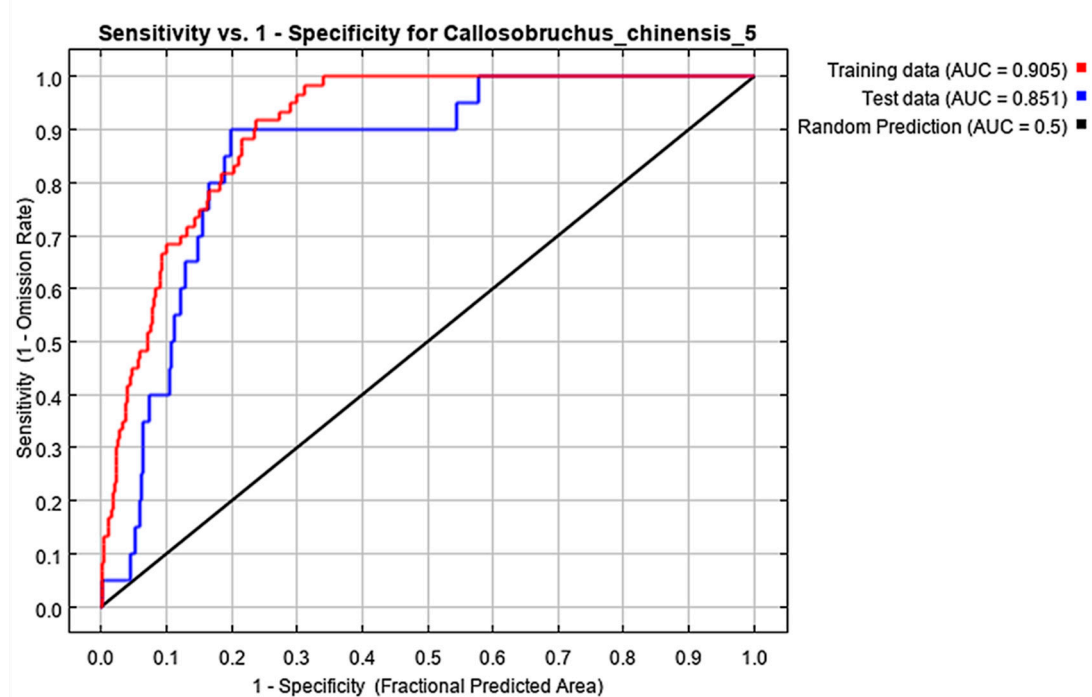

**Figure S4.** Correlation analysis between pairwise linearized  $\Phi_{ST} / (1 - \Phi_{ST})$  values and the logarithm of geographic distance in Chinese populations of *Callosobruchus chinensis* based on concatenated mitochondrial genes.

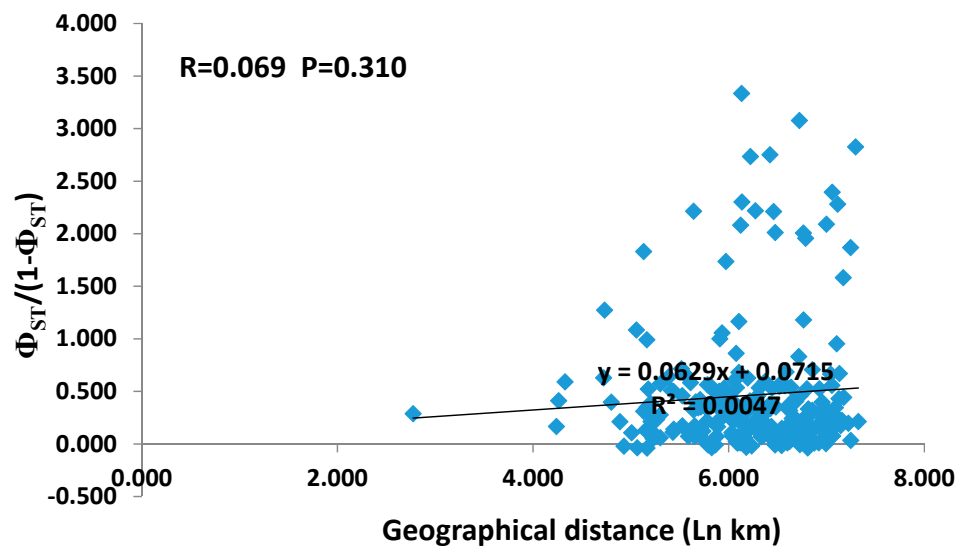

**Figure S5.** The results of the jackknife test on AUC for *Callosobruchus chinensis* in China to estimate environmental variable significance performed by Maxent.

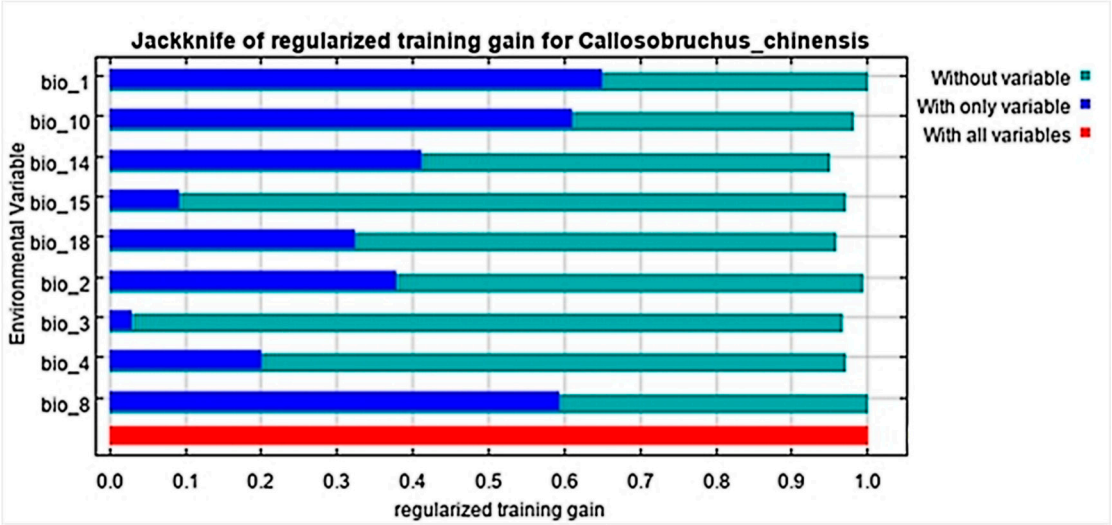

Supplement: s1 [file s1]
